# Supplementary material
Source: PubMed Central journal article supplement (PMC2688972)
Supplement: 0902972106_ST1_PDF.pdf [file 0902972106_ST1_PDF.pdf]

| Detection method                           | PCR Primers                                          | Polymorphism                                                                                |
|--------------------------------------------|------------------------------------------------------|---------------------------------------------------------------------------------------------|
| 1% agarose gel                             | Ac132R+bz-Y6                                         | <i>Ds2(D1)</i> in <i>bz</i> exon2 @ <a href="#">336</a>                                     |
| 1% agarose gel                             | bz-3'-2F+stc1-H1                                     | MITEs in <i>bz-stc1</i> IGR @ <a href="#">1146-2297</a>                                     |
| 1% agarose gel                             | stc1-H1F+stc1-H1R                                    | <i>Ins5</i> in <i>stc1</i> 3'UTR @ <a href="#">2297</a>                                     |
| 1% agarose gel                             | stc1-H6F1+stc1-H6R1                                  | <i>Ins6</i> in <i>stc1</i> intr. 3 @ <a href="#">5270</a>                                   |
| sequenced by stc1-PF3 and stc1-PR1         | stc1-PF3+stc1-PR1                                    | 30-bp indel in <i>stc1</i> -5'UTR @ <a href="#">7261</a>                                    |
| 3.5% Metophar agarose gel or 0.8% PAGE gel | 1st: stc1-PF3+stc1-PR2;<br>2nd: stc1PF4+stc1-PR1     | 9-bp indel in <i>stc1-rpl</i> IGR @ <a href="#">7436</a>                                    |
| Sequenced by stc1-PF3 and LHrplR4          | stc-PF3+LHrpl4                                       | SNPs in <i>stc1-rpl</i> IGR. I @ <a href="#">7500-7575</a> ; II @ <a href="#">7640-8032</a> |
| 0.8% PAGE gel                              | 1st: LHrplF1+LHrplR3;<br>2nd: LHrplF2+LHrplR4        | 7-bp indel @ <a href="#">8117</a> in <i>stc1-rpl</i> IGR                                    |
| Sequenced by Lhtac6058                     | Lhtac6058+Lh1hpR4                                    | SNPs in <i>tac6058-hyp1</i> IGR @ <a href="#">12257-12721</a>                               |
| Sequenced by Lh1hpR1                       | Lh1hpF1+Lh1hpR1                                      | SNP upstream of <i>hypro1</i> @ <a href="#">14311-12</a>                                    |
| 1% agarose gel                             | 3hp7+HelA-5'-R2                                      | 676-bp indel in <i>HelA's hypro2</i> @ <a href="#">22714</a>                                |
| Sequenced by rlk6                          | HelB-3'-rlk6+HelB-3'-rlk4                            | SNP in <i>HelB's rlk</i> @ <a href="#">27069</a>                                            |
| Sequenced                                  | znfF9+znfR9                                          | SNP upstream of <i>znf</i> @ <a href="#">80095</a>                                          |
| PvuII digestion of PCR product             | znfF2+znfR2                                          | CAP in <i>znf</i> 5' UTR @ <a href="#">81180</a>                                            |
| 0.8% PAGE gel                              | znfgF3+znfR3                                         | 6-bp indel in <i>znf</i> CDS @ <a href="#">81609</a>                                        |
| 0.8% PAGE gel                              | 1st: znf-5-F1+znf-5-R1; 2nd: znf-5-F2+znf-5-R2       | 6-bp indel in <i>znf</i> CDS (next to stop codon) @ <a href="#">82236</a>                   |
| 0.8% PAGE gel                              | 1st: znf-hATF3+znfhATR2;<br>2nd: znf-hATF1+znf-hATR1 | 5-bp Indel downstream of <i>znf</i> polyA+ site @ <a href="#">82753</a>                     |
| 0.8% PAGE gel                              | 1st: znf-hATF3+znfhATR2;<br>2nd: znf-hATF2+znf-hATR2 | Indel downstream of <i>znf</i> polyA+ site @ <a href="#">83166</a>                          |
| 1% agarose gel                             | znfF5+znfR5                                          | hAT TE in W22 <i>znf-tac7077</i> IGR @ <a href="#">84000</a>                                |
| 1% agarose gel                             | Ac4372+tac7077F1                                     | Ac7077 in <i>tac7077</i> promoter @ <a href="#">99240</a>                                   |

Supplemental Table 1. *bz-tac7077* recombination in *bz-m2(D1)* Ac7077/Bz-W22 + heterozygotes

| Polymorphism                                               | Total     | 4         | 0        | 31        | 15        | 0        | 0        | 12        | 6        | 0        | 0        | 0        | 0        | 0        | 2        | 1        | 1        | 6        | 3        | 0        | 0         | 81 |   |
|------------------------------------------------------------|-----------|-----------|----------|-----------|-----------|----------|----------|-----------|----------|----------|----------|----------|----------|----------|----------|----------|----------|----------|----------|----------|-----------|----|---|
| <i>Ds2(D1)</i> in <i>bz</i> exon2 @ 336                    |           |           |          |           |           |          |          |           |          |          |          |          |          |          |          |          |          |          |          |          |           |    |   |
| MITEs in <i>bz-stc1</i> IGR @1146-2297                     |           |           |          |           |           |          |          |           |          |          |          |          |          |          |          |          |          |          |          |          |           |    |   |
| <i>Ins5</i> in <i>stc1</i> 3'UTR @ 2297                    |           |           |          |           |           |          |          |           |          |          |          |          |          |          |          |          |          |          |          |          |           |    |   |
| <i>Ins6</i> in <i>stc1</i> intr. 3 @ 5270                  |           |           |          |           |           |          |          |           |          |          |          |          |          |          |          |          |          |          |          |          |           |    |   |
| 30-bp indel in <i>stc1</i> -5'UTR @ 7261                   |           |           |          |           |           |          |          |           |          |          |          |          |          |          |          |          |          |          |          |          |           |    |   |
| 9-bp indel in <i>stc1-rpl</i> IGR @ 7436                   |           |           |          |           |           |          |          |           |          |          |          |          |          |          |          |          |          |          |          |          |           |    |   |
| SNPs in <i>stc1-rpl</i> IGR. I @ 7500-7575; II @ 7640-8032 |           |           |          |           |           |          |          |           |          |          |          |          |          |          |          |          |          |          |          |          |           |    |   |
| 7-bp indel @ 8117 in <i>stc1-rpl</i> IGR                   |           |           |          |           |           |          |          |           |          |          |          |          |          |          |          |          |          |          |          |          |           |    |   |
| SNPs in <i>tac6058-hyp1</i> IGR @ 12257-12721              |           |           |          |           |           |          |          |           |          |          |          |          |          |          |          |          |          |          |          |          |           |    |   |
| SNP upstream of <i>hypro1</i> @ 14311-12                   |           |           |          |           |           |          |          |           |          |          |          |          |          |          |          |          |          |          |          |          |           |    |   |
| 676-bp indel in <i>HelA</i> 's <i>hypro2</i> @ 22714       |           |           |          |           |           |          |          |           |          |          |          |          |          |          |          |          |          |          |          |          |           |    |   |
| SNP in <i>HelB</i> 's <i>rlk</i> @ 27069                   |           |           |          |           |           |          |          |           |          |          |          |          |          |          |          |          |          |          |          |          |           |    |   |
| SNP upstream of <i>znf</i> @ 80095                         |           |           |          |           |           |          |          |           |          |          |          |          |          |          |          |          |          |          |          |          |           |    |   |
| CAP in <i>znf</i> 5' UTR @ 81180                           |           |           |          |           |           |          |          |           |          |          |          |          |          |          |          |          |          |          |          |          |           |    |   |
| 6-bp indel in <i>znf</i> CDS @ 81609                       |           |           |          |           |           |          |          |           |          |          |          |          |          |          |          |          |          |          |          |          |           |    |   |
| 6-bp indel in <i>znf</i> CDS (next to stop codon) @ 82236  |           |           |          |           |           |          |          |           |          |          |          |          |          |          |          |          |          |          |          |          |           |    |   |
| 5-bp Indel downstream of <i>znf</i> polyA+ site @ 82753    |           |           |          |           |           |          |          |           |          |          |          |          |          |          |          |          |          |          |          |          |           |    |   |
| Indel downstream of <i>znf</i> polyA+ site @ 83166         |           |           |          |           |           |          |          |           |          |          |          |          |          |          |          |          |          |          |          |          |           |    |   |
| hAT <i>TE</i> in W22 <i>znf-tac7077</i> IGR @ 84000        |           |           |          |           |           |          |          |           |          |          |          |          |          |          |          |          |          |          |          |          |           |    |   |
| Ac7077 in <i>tac7077</i> promoter @ 99240                  |           |           |          |           |           |          |          |           |          |          |          |          |          |          |          |          |          |          |          |          |           |    |   |
| <b>subtotal</b>                                            | <b>4</b>  | <b>4</b>  | <b>0</b> | <b>31</b> | <b>15</b> | <b>0</b> | <b>0</b> | <b>12</b> | <b>6</b> | <b>0</b> | <b>0</b> | <b>0</b> | <b>0</b> | <b>2</b> | <b>1</b> | <b>1</b> | <b>6</b> | <b>3</b> | <b>0</b> | <b>0</b> | <b>81</b> |    |   |
| <i>D4272-15-1</i> A                                        | W         | W         | W        | W         | W         |          |          |           |          |          |          |          |          |          |          |          |          |          |          |          | W         | -  |   |
| <i>D4274-12</i> A                                          | W         | W         | W        | W         | W         |          |          |           |          |          |          |          |          |          |          |          |          |          |          |          |           | W  | - |
| <i>D4276-7</i> A                                           | W         | W         | W        | W         | W         |          |          |           |          |          |          |          |          |          |          |          |          |          |          |          |           | W  | - |
| <i>D4274-4-3</i> A                                         | W         | W         | W        | W         | W         |          |          |           |          |          |          |          |          |          |          |          |          |          |          |          |           | W  | - |
| <b>subtotal</b>                                            | <b>4</b>  | <b>4</b>  | <b>0</b> | <b>31</b> | <b>15</b> | <b>0</b> | <b>0</b> | <b>12</b> | <b>6</b> | <b>0</b> | <b>0</b> | <b>0</b> | <b>0</b> | <b>2</b> | <b>1</b> | <b>1</b> | <b>6</b> | <b>3</b> | <b>0</b> | <b>0</b> | <b>81</b> |    |   |
| <i>D4276-13-5</i> A                                        | A         | A         | A        | W         | W         |          |          |           |          | W        |          |          |          |          |          |          |          |          |          |          |           | W  |   |
| <i>D4272-1-2</i> A                                         | A         | A         | A        | W         | W         |          |          |           |          |          |          |          |          |          |          |          |          |          |          |          |           | W  |   |
| <i>D4272-2-1</i> A                                         | A         | A         | A        | W         | W         |          |          |           |          |          |          |          |          |          |          |          |          |          |          |          |           | W  |   |
| <i>D4272-4-1</i> A                                         | A         | A         | A        | W         | W         |          |          |           |          |          |          |          |          |          |          |          |          |          |          |          |           | W  |   |
| <i>D4272-4-2</i> A                                         | A         | A         | A        | W         | W         |          |          |           |          |          |          |          |          |          |          |          |          |          |          |          |           | W  |   |
| <i>D4272-5-5</i> A                                         | A         | A         | A        | W         | W         |          |          |           |          |          |          |          |          |          |          |          |          |          |          |          |           | W  |   |
| <i>D4272-6-2</i> A                                         | A         | A         | A        | W         | W         |          |          |           |          |          |          |          |          |          |          |          |          |          |          |          |           | W  |   |
| <i>D4272-7</i> A                                           | A         | A         | A        | W         | W         |          |          |           |          |          |          |          |          |          |          |          |          |          |          |          |           | W  |   |
| <i>D4272-9-1</i> A                                         | A         | A         | A        | W         | W         |          |          |           |          |          |          |          |          |          |          |          |          |          |          |          |           | W  |   |
| <i>D4272-13-3</i> A                                        | A         | A         | A        | W         | W         |          |          |           |          |          |          |          |          |          |          |          |          |          |          |          |           | W  |   |
| <i>D4272-15-6</i> A                                        | A         | A         | A        | W         | W         |          |          |           |          |          |          |          |          |          |          |          |          |          |          |          |           | W  |   |
| <i>D4272-20-1</i> A                                        | A         | A         | A        | W         | W         |          |          |           |          |          |          |          |          |          |          |          |          |          |          |          |           | W  |   |
| <i>D4272-20-4</i> A                                        | A         | A         | A        | W         | W         |          |          |           |          |          |          |          |          |          |          |          |          |          |          |          |           | W  |   |
| <i>D4274-7-1</i> A                                         | A         | A         | A        | W         | W         |          |          |           |          |          |          |          |          |          |          |          |          |          |          |          |           | W  |   |
| <i>D4274-8-3</i> A                                         | A         | A         | A        | W         | W         |          |          |           |          |          |          |          |          |          |          |          |          |          |          |          |           | W  |   |
| <i>D4274-8-5</i> A                                         | A         | A         | A        | W         | W         |          |          |           |          |          |          |          |          |          |          |          |          |          |          |          |           | W  |   |
| <i>D4274-9</i> A                                           | A         | A         | A        | W         | W         |          |          |           |          |          |          |          |          |          |          |          |          |          |          |          |           | W  |   |
| <i>D4276-1-2</i> A                                         | A         | A         | A        | W         | W         |          |          |           |          |          |          |          |          |          |          |          |          |          |          |          |           | W  |   |
| <i>D4276-2-2</i> A                                         | A         | A         | A        | W         | W         |          |          |           |          |          |          |          |          |          |          |          |          |          |          |          |           | W  |   |
| <i>D4276-3-3</i> A                                         | A         | A         | A        | W         | W         |          |          |           |          |          |          |          |          |          |          |          |          |          |          |          |           | W  |   |
| <i>D4276-3-4</i> A                                         | A         | A         | A        | W         | W         |          |          |           |          |          |          |          |          |          |          |          |          |          |          |          |           | W  |   |
| <i>D4276-4-3</i> A                                         | A         | A         | A        | W         | W         |          |          |           |          |          |          |          |          |          |          |          |          |          |          |          |           | W  |   |
| <i>D4276-5</i> A                                           | A         | A         | A        | W         | W         |          |          |           |          |          |          |          |          |          |          |          |          |          |          |          |           | W  |   |
| <i>D4276-8</i> A                                           | A         | A         | A        | W         | W         |          |          |           |          |          |          |          |          |          |          |          |          |          |          |          |           | W  |   |
| <i>D4276-12</i> A                                          | A         | A         | A        | W         | W         |          |          |           |          |          |          |          |          |          |          |          |          |          |          |          |           | W  |   |
| <i>D4274-1-5</i> A                                         | A         | A         | A        | W         | W         |          |          |           |          |          |          |          |          |          |          |          |          |          |          |          |           | W  |   |
| <i>D4274-2-4</i> A                                         | A         | A         | A        | W         | W         |          |          |           |          |          |          |          |          |          |          |          |          |          |          |          |           | W  |   |
| <i>D4276-11-2</i> A                                        | A         | A         | A        | W         | W         |          |          |           |          |          |          |          |          |          |          |          |          |          |          |          |           | W  |   |
| <i>D4276-13-6</i> A                                        | A         | A         | A        | W         | W         |          |          |           |          |          |          |          |          |          |          |          |          |          |          |          |           | W  |   |
| <i>D4276-14</i> A                                          | A         | A         | A        | W         | W         |          |          |           |          |          |          |          |          |          |          |          |          |          |          |          |           | W  |   |
| <i>D4274-2-6</i> A                                         | A         | A         | A        | W         | W         |          |          |           |          |          |          |          |          |          |          |          |          |          |          |          |           | W  |   |
| <b>subtotal</b>                                            | <b>31</b> | <b>31</b> | <b>0</b> | <b>31</b> | <b>15</b> | <b>0</b> | <b>0</b> | <b>12</b> | <b>6</b> | <b>0</b> | <b>0</b> | <b>0</b> | <b>0</b> | <b>2</b> | <b>1</b> | <b>1</b> | <b>6</b> | <b>3</b> | <b>0</b> | <b>0</b> | <b>81</b> |    |   |
| <i>D4272-3-4</i> A                                         | W         | W         | W        | W         | W         |          |          |           |          |          |          |          |          |          |          |          |          |          |          |          |           | W  |   |
| <i>D4272-4-3</i> A                                         | W         | W         | W        | W         | W         |          |          |           |          |          |          |          |          |          |          |          |          |          |          |          |           | W  |   |
| <i>D4272-9-4</i> A                                         | W         | W         | W        | W         | W         |          |          |           |          |          |          |          |          |          |          |          |          |          |          |          |           | W  |   |
| <i>D4272-20-2</i> A                                        | W         | W         | W        | W         | W         |          |          |           |          |          |          |          |          |          |          |          |          |          |          |          |           | W  |   |
| <i>D4274-8-4</i> A                                         | W         | W         | W        | W         | W         |          |          |           |          |          |          |          |          |          |          |          |          |          |          |          |           | W  |   |
| <i>D4276-1-1</i> A                                         | W         | W         | W        | W         | W         |          |          |           |          |          |          |          |          |          |          |          |          |          |          |          |           | W  |   |
| <i>D4276-2-1</i> A                                         | W         | W         | W        | W         | W         |          |          |           |          |          |          |          |          |          |          |          |          |          |          |          |           | W  |   |
| <i>D4276-4-1</i> A                                         | W         | W         | W        | W         | W         |          |          |           |          |          |          |          |          |          |          |          |          |          |          |          |           | W  |   |
| <i>D4276-6-3</i> A                                         | W         | W         | W        | W         | W         |          |          |           |          |          |          |          |          |          |          |          |          |          |          |          |           | W  |   |
| <i>D4276-9-1</i> A                                         | W         | W         | W        | W         | W         |          |          |           |          |          |          |          |          |          |          |          |          |          |          |          |           | W  |   |
| <i>D4276-9-2</i> A                                         | W         | W         | W        | W         | W         |          |          |           |          |          |          |          |          |          |          |          |          |          |          |          |           | W  |   |
| <i>D4274-1-1</i> A                                         | W         | W         | W        | W         | W         |          |          |           |          |          |          |          |          |          |          |          |          |          |          |          |           | W  |   |

A = Ac7077 marker; W = W22 marker
