# Supplementary material
Source: PubMed Central journal article supplement (PMC2688972)
Supplement: 0902972106_ST2_PDF.pdf [file 0902972106_ST2_PDF.pdf]

A = Ac7077 marker; B = B73 marker

| Polymorphism & detection method                   | Primers                                                    | Polymorphisms between Ac7077 and B73                    |
|---------------------------------------------------|------------------------------------------------------------|---------------------------------------------------------|
|                                                   |                                                            | <i>Ds2(D1)</i> in <i>bz</i> exon2 @ 336                 |
| Tour <i>Zm7</i> & <i>Ins4</i> MITEs by 1% agarose | <i>bz</i> -H1 + <i>bz</i> -H3                              | Ac7077 MITEs in <i>bz-stc1</i> IGR @1146-1847           |
| Ac7077 <i>bz-stc1</i> IGR by 1% agarose           | <i>bz</i> -H1 + <i>stc1</i> -H1                            | Ac7077 <i>bz-stc1</i> IGR; no Tekay @ 2690              |
| MITE <i>Ins6</i> by 1% agarose                    | <i>stc1</i> -H6F1 + <i>stc1</i> -H6R1                      | <i>Ins6</i> in <i>stc1</i> intr. 3 @ 5270               |
| Indel @ 6500 by sequencing                        | <i>stc1</i> -RSF6F + <i>stc1</i> RSR2                      | 3-bp indel in <i>stc1</i> exon 2 @ 6500                 |
| Indel @ 7436 by sequencing                        |                                                            | 9-bp indel in <i>stc1-rpl</i> IGR @ 7436                |
| 3 SNPs @ primer site by 1% agarose                | <i>stc1</i> -PF4 + LHRpl-R4                                | SNPs @ 7500-7575 in <i>stc1-rpl35A</i> IGR              |
| Indel @ 7740 by 1% agarose                        | <i>stc1</i> -PF4+ <i>rpl35A</i> -R1                        | Indel @ 7740 in <i>stc1-rpl35A</i> IGR                  |
| SNP @ 11707 (BglII) by 1% agarose                 | <i>rpl35A</i> -4 + <i>tac6058</i> -2/Bgl II                | SNP @ 11707 (BglII) in <i>tac6058</i>                   |
| SNP @ 12721 (SphI) by 8% PAGE                     | LHtac6058 + LHihpR4/SphI                                   | SNP @ 12721 (SphI) in <i>hypro1</i>                     |
| <i>Ins11</i> @ 14400 by 1% agarose                | 1hp8 + LH1hp-R1                                            | <i>Ins11</i> @ 14400 in B <i>hypro1-znf</i> IGR         |
| MITE Tourist <i>Zm10</i> @ 15833-16014 by 1%      | <i>zm20F1</i> + R1                                         | Tourist- <i>Zm10</i> @ 15833 in M <i>hypro1-znf</i> IGR |
| <i>Ins7</i> @ 17570-17980 by 1% agarose           | <i>zm3F2</i> + <i>zm3R2</i>                                | <i>Ins7</i> @ 17570 in M <i>hypro1-znf</i> IGR          |
| SNP @ 81935 by 1% agarose                         | <i>znf</i> -F2 + <i>znfgR1</i> SNP in <i>znfgR1</i> primer | SNP @ 81935 in <i>znf</i>                               |
| Indel @ 82753 by 8% PAGE                          | 1st: <i>znf</i> -hAT-F3+R3<br>2nd: <i>znf</i> -hAT-F1+R1   | Indel @ 82753 beyond <i>znf</i> polyA                   |
| Indel @ 82924 & SNP @ 83020 by sequencing         | <i>znf</i> -hAT-F3+R3                                      | Indel @ 82924 & SNP @ 83020 3' of <i>znf</i>            |
| SNP @ 83268 by sequencing                         | <i>znf</i> -hAT-R3rev+ <i>znf</i> -F5Rev                   | SNP @ 83268 in <i>znf-Grande1</i> IGR                   |
| SNP @ 84000 by sequencing                         | <i>znf</i> -F5+ <i>znf</i> -3-R1                           | SNP @ 84000 in <i>znf-Grande1</i> IGR                   |
| SNP @ 98132 by sequencing                         | GtacF3+GtacR3                                              | SNP @ 98132                                             |
| Indel @ 98868 by 8% PAGE                          | B73tac7077F2+B73tac7077R1                                  | Indel @ 98868                                           |
| Ac7077 insertion site @ 92240 by 1% agarose       | <i>tac7077F1</i> +Ac4372                                   | Ac7077 @ 92240                                          |

Supplemental Table 2. *bz-tac7077* recombination in *bz-m2(D1)* Ac7077/Bz-B73 + heterozygotes

Supplemental Table 2. *bz-tac7077* recombination in *bz-m2(D1)* Ac7077/Bz-B73 + heterozygotes

| Polymorphisms between Ac7077 and B73    | <p>Ds2(D1) in <i>bz</i> exon2 @ 336<br/>                     Ac7077 MITEs in <i>bz-stc1</i> IGR @1146-1847<br/>                     Ac7077 <i>bz-stc1</i> IGR; no Tekay @ 2690<br/> <i>Ins6</i> in <i>stc1</i> intr. 3 @ 5270<br/>                     3-bp indel in <i>stc1</i> exon 2 @ 6500<br/>                     9-bp indel in <i>stc1-rpl</i> IGR @ 7436<br/>                     SNPs @ 7500-7575 in <i>stc1-rpl35A</i> IGR<br/>                     Indel @ 7740 in <i>stc1-rpl35A</i> IGR<br/>                     SNP @ 11707 (BglII) in <i>tac6058</i><br/>                     SNP @ 12721 (SphI) in <i>hypro1</i><br/> <i>Ins11</i> @ 14400 in B <i>hypro1-znf</i> IGR<br/> <i>Tourist-Zm10</i> @ 15833 in M <i>hypro1-znf</i> IGR<br/> <i>Ins7</i> @ 17570 in M <i>hypro1-znf</i> IGR<br/>                     SNP @ 81935 in <i>znf</i><br/>                     Indel @ 82753 beyond <i>znf</i> polyA<br/>                     Indel @ 82924 &amp; SNP @ 83020 3' of <i>znf</i><br/>                     SNP @ 83268 in <i>znf-Grande1</i> IGR<br/>                     SNP @ 84000 in <i>znf-Grande1</i> IGR<br/>                     SNP @ 98132<br/>                     Indel @ 98868<br/>                     Ac7077 @ 99240</p> |   |    |    |   |   |   |   |   |   |   |   |   |   |   |   |    |    |   |   |
|-----------------------------------------|---------------------------------------------------------------------------------------------------------------------------------------------------------------------------------------------------------------------------------------------------------------------------------------------------------------------------------------------------------------------------------------------------------------------------------------------------------------------------------------------------------------------------------------------------------------------------------------------------------------------------------------------------------------------------------------------------------------------------------------------------------------------------------------------------------------------------------------------------------------------------------------------------------------------------------------------------------------------------------------------------------------------------------------------------------------------------------------------------------------------------------------------------------------------------------------------------------------------------------------------------------|---|----|----|---|---|---|---|---|---|---|---|---|---|---|---|----|----|---|---|
| Total                                   | 0                                                                                                                                                                                                                                                                                                                                                                                                                                                                                                                                                                                                                                                                                                                                                                                                                                                                                                                                                                                                                                                                                                                                                                                                                                                       | 0 | 15 | 31 | 0 | 2 | 0 | 5 | 5 | 0 | 0 | 2 | 0 | 3 | 0 | 1 | 10 | 11 | 1 | 1 |
| D4269-3-2                               | A                                                                                                                                                                                                                                                                                                                                                                                                                                                                                                                                                                                                                                                                                                                                                                                                                                                                                                                                                                                                                                                                                                                                                                                                                                                       | A | A  | B  |   |   |   |   |   |   |   |   |   |   |   |   |    |    |   |   |
| D4269-15-1                              | A                                                                                                                                                                                                                                                                                                                                                                                                                                                                                                                                                                                                                                                                                                                                                                                                                                                                                                                                                                                                                                                                                                                                                                                                                                                       | A | A  | B  |   |   |   |   |   |   |   |   |   |   |   |   |    |    |   |   |
| D4269-15-2                              | A                                                                                                                                                                                                                                                                                                                                                                                                                                                                                                                                                                                                                                                                                                                                                                                                                                                                                                                                                                                                                                                                                                                                                                                                                                                       | A | A  | B  |   |   |   |   |   |   |   |   |   |   |   |   |    |    |   |   |
| D4269-16-2                              | A                                                                                                                                                                                                                                                                                                                                                                                                                                                                                                                                                                                                                                                                                                                                                                                                                                                                                                                                                                                                                                                                                                                                                                                                                                                       | A | A  | B  |   |   |   |   |   |   |   |   |   |   |   |   |    |    |   |   |
| D4269-23-1                              | A                                                                                                                                                                                                                                                                                                                                                                                                                                                                                                                                                                                                                                                                                                                                                                                                                                                                                                                                                                                                                                                                                                                                                                                                                                                       | A | A  | B  |   |   |   |   |   |   |   |   |   |   |   |   |    |    |   |   |
| D4269-23-5                              | A                                                                                                                                                                                                                                                                                                                                                                                                                                                                                                                                                                                                                                                                                                                                                                                                                                                                                                                                                                                                                                                                                                                                                                                                                                                       | A | A  | B  |   |   |   |   |   |   |   |   |   |   |   |   |    |    |   |   |
| D4269-27-1                              | A                                                                                                                                                                                                                                                                                                                                                                                                                                                                                                                                                                                                                                                                                                                                                                                                                                                                                                                                                                                                                                                                                                                                                                                                                                                       | A | A  | B  |   |   |   |   |   |   |   |   |   |   |   |   |    |    |   |   |
| D4267-6-2                               | A                                                                                                                                                                                                                                                                                                                                                                                                                                                                                                                                                                                                                                                                                                                                                                                                                                                                                                                                                                                                                                                                                                                                                                                                                                                       | A | A  | B  |   |   |   |   |   |   |   |   |   |   |   |   |    |    |   |   |
| D4267-8-1                               | A                                                                                                                                                                                                                                                                                                                                                                                                                                                                                                                                                                                                                                                                                                                                                                                                                                                                                                                                                                                                                                                                                                                                                                                                                                                       | A | A  | B  |   |   |   |   |   |   |   |   |   |   |   |   |    |    |   |   |
| D4268-2-3                               | A                                                                                                                                                                                                                                                                                                                                                                                                                                                                                                                                                                                                                                                                                                                                                                                                                                                                                                                                                                                                                                                                                                                                                                                                                                                       | A | A  | B  |   |   |   |   |   |   |   |   |   |   |   |   |    |    |   |   |
| D4268-12-3                              | A                                                                                                                                                                                                                                                                                                                                                                                                                                                                                                                                                                                                                                                                                                                                                                                                                                                                                                                                                                                                                                                                                                                                                                                                                                                       | A | A  | B  |   |   |   |   |   |   |   |   |   |   |   |   |    |    |   |   |
| D4268-13-1                              | A                                                                                                                                                                                                                                                                                                                                                                                                                                                                                                                                                                                                                                                                                                                                                                                                                                                                                                                                                                                                                                                                                                                                                                                                                                                       | A | A  | B  |   |   |   |   |   |   |   |   |   |   |   |   |    |    |   |   |
| D4268-14-1                              | A                                                                                                                                                                                                                                                                                                                                                                                                                                                                                                                                                                                                                                                                                                                                                                                                                                                                                                                                                                                                                                                                                                                                                                                                                                                       | A | A  | B  |   |   |   |   |   |   |   |   |   |   |   |   |    |    |   |   |
| D4268-25-2                              | A                                                                                                                                                                                                                                                                                                                                                                                                                                                                                                                                                                                                                                                                                                                                                                                                                                                                                                                                                                                                                                                                                                                                                                                                                                                       | A | A  | B  |   |   |   |   |   |   |   |   |   |   |   |   |    |    |   |   |
| D4268-28                                | A                                                                                                                                                                                                                                                                                                                                                                                                                                                                                                                                                                                                                                                                                                                                                                                                                                                                                                                                                                                                                                                                                                                                                                                                                                                       | A | A  | B  |   |   |   |   |   |   |   |   |   |   |   |   |    |    |   |   |
| Subtotal ( <i>stc1-2690-Ins6-5270</i> ) |                                                                                                                                                                                                                                                                                                                                                                                                                                                                                                                                                                                                                                                                                                                                                                                                                                                                                                                                                                                                                                                                                                                                                                                                                                                         |   | 15 |    |   |   |   |   |   |   |   |   |   |   |   |   |    |    |   |   |
| D4267-4-3                               | A                                                                                                                                                                                                                                                                                                                                                                                                                                                                                                                                                                                                                                                                                                                                                                                                                                                                                                                                                                                                                                                                                                                                                                                                                                                       | A | A  | B  |   |   |   |   |   |   |   |   |   |   |   |   |    |    |   |   |
| D4268-3                                 | A                                                                                                                                                                                                                                                                                                                                                                                                                                                                                                                                                                                                                                                                                                                                                                                                                                                                                                                                                                                                                                                                                                                                                                                                                                                       | A | A  | B  |   |   |   |   |   |   |   |   |   |   |   |   |    |    |   |   |
| D4268-13-3                              | A                                                                                                                                                                                                                                                                                                                                                                                                                                                                                                                                                                                                                                                                                                                                                                                                                                                                                                                                                                                                                                                                                                                                                                                                                                                       | A | A  | B  |   |   |   |   |   |   |   |   |   |   |   |   |    |    |   |   |
| D4268-23                                | A                                                                                                                                                                                                                                                                                                                                                                                                                                                                                                                                                                                                                                                                                                                                                                                                                                                                                                                                                                                                                                                                                                                                                                                                                                                       | A | A  | B  |   |   |   |   |   |   |   |   |   |   |   |   |    |    |   |   |
| D4268-26                                | A                                                                                                                                                                                                                                                                                                                                                                                                                                                                                                                                                                                                                                                                                                                                                                                                                                                                                                                                                                                                                                                                                                                                                                                                                                                       | A | A  | B  |   |   |   |   |   |   |   |   |   |   |   |   |    |    |   |   |
| D4267-4-1                               | A                                                                                                                                                                                                                                                                                                                                                                                                                                                                                                                                                                                                                                                                                                                                                                                                                                                                                                                                                                                                                                                                                                                                                                                                                                                       | A | A  | B  |   |   |   |   |   |   |   |   |   |   |   |   |    |    |   |   |
| D4267-9-1                               | A                                                                                                                                                                                                                                                                                                                                                                                                                                                                                                                                                                                                                                                                                                                                                                                                                                                                                                                                                                                                                                                                                                                                                                                                                                                       | A | A  | B  |   |   |   |   |   |   |   |   |   |   |   |   |    |    |   |   |
| D4268-4                                 | A                                                                                                                                                                                                                                                                                                                                                                                                                                                                                                                                                                                                                                                                                                                                                                                                                                                                                                                                                                                                                                                                                                                                                                                                                                                       | A | A  | B  |   |   |   |   |   |   |   |   |   |   |   |   |    |    |   |   |
| D4268-5-1                               | A                                                                                                                                                                                                                                                                                                                                                                                                                                                                                                                                                                                                                                                                                                                                                                                                                                                                                                                                                                                                                                                                                                                                                                                                                                                       | A | A  | B  |   |   |   |   |   |   |   |   |   |   |   |   |    |    |   |   |
| D4268-8                                 | A                                                                                                                                                                                                                                                                                                                                                                                                                                                                                                                                                                                                                                                                                                                                                                                                                                                                                                                                                                                                                                                                                                                                                                                                                                                       | A | A  | B  |   |   |   |   |   |   |   |   |   |   |   |   |    |    |   |   |
| D4268-10-2                              | A                                                                                                                                                                                                                                                                                                                                                                                                                                                                                                                                                                                                                                                                                                                                                                                                                                                                                                                                                                                                                                                                                                                                                                                                                                                       | A | A  | B  |   |   |   |   |   |   |   |   |   |   |   |   |    |    |   |   |
| D4268-12-2                              | A                                                                                                                                                                                                                                                                                                                                                                                                                                                                                                                                                                                                                                                                                                                                                                                                                                                                                                                                                                                                                                                                                                                                                                                                                                                       | A | A  | B  |   |   |   |   |   |   |   |   |   |   |   |   |    |    |   |   |
| D4268-15-1                              | A                                                                                                                                                                                                                                                                                                                                                                                                                                                                                                                                                                                                                                                                                                                                                                                                                                                                                                                                                                                                                                                                                                                                                                                                                                                       | A | A  | B  |   |   |   |   |   |   |   |   |   |   |   |   |    |    |   |   |
| D4268-25-1                              | A                                                                                                                                                                                                                                                                                                                                                                                                                                                                                                                                                                                                                                                                                                                                                                                                                                                                                                                                                                                                                                                                                                                                                                                                                                                       | A | A  | B  |   |   |   |   |   |   |   |   |   |   |   |   |    |    |   |   |
| D4268-15-4                              | A                                                                                                                                                                                                                                                                                                                                                                                                                                                                                                                                                                                                                                                                                                                                                                                                                                                                                                                                                                                                                                                                                                                                                                                                                                                       | A | A  | B  |   |   |   |   |   |   |   |   |   |   |   |   |    |    |   |   |
| D4268-21-4                              | A                                                                                                                                                                                                                                                                                                                                                                                                                                                                                                                                                                                                                                                                                                                                                                                                                                                                                                                                                                                                                                                                                                                                                                                                                                                       | A | A  | B  |   |   |   |   |   |   |   |   |   |   |   |   |    |    |   |   |
| D4269-1                                 | A                                                                                                                                                                                                                                                                                                                                                                                                                                                                                                                                                                                                                                                                                                                                                                                                                                                                                                                                                                                                                                                                                                                                                                                                                                                       | X | X  | B  |   |   |   |   |   |   |   |   |   |   |   |   |    |    |   |   |
| D4269-3-1                               | A                                                                                                                                                                                                                                                                                                                                                                                                                                                                                                                                                                                                                                                                                                                                                                                                                                                                                                                                                                                                                                                                                                                                                                                                                                                       | X | X  | B  |   |   |   |   |   |   |   |   |   |   |   |   |    |    |   |   |
| D4269-5                                 | A                                                                                                                                                                                                                                                                                                                                                                                                                                                                                                                                                                                                                                                                                                                                                                                                                                                                                                                                                                                                                                                                                                                                                                                                                                                       | A | A  | B  |   |   |   |   |   |   |   |   |   |   |   |   |    |    |   |   |
| D4269-7-2                               | A                                                                                                                                                                                                                                                                                                                                                                                                                                                                                                                                                                                                                                                                                                                                                                                                                                                                                                                                                                                                                                                                                                                                                                                                                                                       | A | A  | B  |   |   |   |   |   |   |   |   |   |   |   |   |    |    |   |   |
| D4269-12                                | A                                                                                                                                                                                                                                                                                                                                                                                                                                                                                                                                                                                                                                                                                                                                                                                                                                                                                                                                                                                                                                                                                                                                                                                                                                                       | A | A  | B  |   |   |   |   |   |   |   |   |   |   |   |   |    |    |   |   |
| D4269-18                                | A                                                                                                                                                                                                                                                                                                                                                                                                                                                                                                                                                                                                                                                                                                                                                                                                                                                                                                                                                                                                                                                                                                                                                                                                                                                       | A | A  | B  |   |   |   |   |   |   |   |   |   |   |   |   |    |    |   |   |
| D4269-22-1                              | A                                                                                                                                                                                                                                                                                                                                                                                                                                                                                                                                                                                                                                                                                                                                                                                                                                                                                                                                                                                                                                                                                                                                                                                                                                                       | A | A  | B  |   |   |   |   |   |   |   |   |   |   |   |   |    |    |   |   |
| D4269-23-2                              | A                                                                                                                                                                                                                                                                                                                                                                                                                                                                                                                                                                                                                                                                                                                                                                                                                                                                                                                                                                                                                                                                                                                                                                                                                                                       | A | A  | B  |   |   |   |   |   |   |   |   |   |   |   |   |    |    |   |   |
| D4269-23-4                              | A                                                                                                                                                                                                                                                                                                                                                                                                                                                                                                                                                                                                                                                                                                                                                                                                                                                                                                                                                                                                                                                                                                                                                                                                                                                       | A | A  | B  |   |   |   |   |   |   |   |   |   |   |   |   |    |    |   |   |
| D4269-25-3                              | A                                                                                                                                                                                                                                                                                                                                                                                                                                                                                                                                                                                                                                                                                                                                                                                                                                                                                                                                                                                                                                                                                                                                                                                                                                                       | A | A  | B  |   |   |   |   |   |   |   |   |   |   |   |   |    |    |   |   |
| D4269-25-4                              | A                                                                                                                                                                                                                                                                                                                                                                                                                                                                                                                                                                                                                                                                                                                                                                                                                                                                                                                                                                                                                                                                                                                                                                                                                                                       | A | A  | B  |   |   |   |   |   |   |   |   |   |   |   |   |    |    |   |   |
| D4269-25-5                              | A                                                                                                                                                                                                                                                                                                                                                                                                                                                                                                                                                                                                                                                                                                                                                                                                                                                                                                                                                                                                                                                                                                                                                                                                                                                       | A | A  | B  |   |   |   |   |   |   |   |   |   |   |   |   |    |    |   |   |
| D4269-27-2                              | A                                                                                                                                                                                                                                                                                                                                                                                                                                                                                                                                                                                                                                                                                                                                                                                                                                                                                                                                                                                                                                                                                                                                                                                                                                                       | X | X  | B  |   |   |   |   |   |   |   |   |   |   |   |   |    |    |   |   |
| D4269-29-2                              | A                                                                                                                                                                                                                                                                                                                                                                                                                                                                                                                                                                                                                                                                                                                                                                                                                                                                                                                                                                                                                                                                                                                                                                                                                                                       | A | A  | B  |   |   |   |   |   |   |   |   |   |   |   |   |    |    |   |   |
| D4269-40                                | A                                                                                                                                                                                                                                                                                                                                                                                                                                                                                                                                                                                                                                                                                                                                                                                                                                                                                                                                                                                                                                                                                                                                                                                                                                                       | X | X  | B  |   |   |   |   |   |   |   |   |   |   |   |   |    |    |   |   |
| Subtotal ( <i>Ins6-5270</i> indel-6500) |                                                                                                                                                                                                                                                                                                                                                                                                                                                                                                                                                                                                                                                                                                                                                                                                                                                                                                                                                                                                                                                                                                                                                                                                                                                         |   |    | 31 |   |   |   |   |   |   |   |   |   |   |   |   |    |    |   |   |
| D4268-18-1                              | A                                                                                                                                                                                                                                                                                                                                                                                                                                                                                                                                                                                                                                                                                                                                                                                                                                                                                                                                                                                                                                                                                                                                                                                                                                                       | A | A  | B  |   |   |   |   |   |   |   |   |   |   |   |   |    |    |   |   |
| D4267-2                                 | A                                                                                                                                                                                                                                                                                                                                                                                                                                                                                                                                                                                                                                                                                                                                                                                                                                                                                                                                                                                                                                                                                                                                                                                                                                                       | A | A  | B  |   |   |   |   |   |   |   |   |   |   |   |   |    |    |   |   |
| Subtotal (Indel-7440--indel-7740)       |                                                                                                                                                                                                                                                                                                                                                                                                                                                                                                                                                                                                                                                                                                                                                                                                                                                                                                                                                                                                                                                                                                                                                                                                                                                         |   |    |    |   |   |   |   | 2 |   |   |   |   |   |   |   |    |    |   |   |
| D4269-2                                 | A                                                                                                                                                                                                                                                                                                                                                                                                                                                                                                                                                                                                                                                                                                                                                                                                                                                                                                                                                                                                                                                                                                                                                                                                                                                       | A | A  | B  |   |   |   |   |   |   |   |   |   |   |   |   |    |    |   |   |
| D4269-25-2                              | A                                                                                                                                                                                                                                                                                                                                                                                                                                                                                                                                                                                                                                                                                                                                                                                                                                                                                                                                                                                                                                                                                                                                                                                                                                                       | A | A  | B  |   |   |   |   |   |   |   |   |   |   |   |   |    |    |   |   |
| D4269-46                                | A                                                                                                                                                                                                                                                                                                                                                                                                                                                                                                                                                                                                                                                                                                                                                                                                                                                                                                                                                                                                                                                                                                                                                                                                                                                       | A | A  | B  |   |   |   |   |   |   |   |   |   |   |   |   |    |    |   |   |
| D4268-6-3                               | A                                                                                                                                                                                                                                                                                                                                                                                                                                                                                                                                                                                                                                                                                                                                                                                                                                                                                                                                                                                                                                                                                                                                                                                                                                                       | A | A  | B  |   |   |   |   |   |   |   |   |   |   |   |   |    |    |   |   |
| D4267-8-3                               | A                                                                                                                                                                                                                                                                                                                                                                                                                                                                                                                                                                                                                                                                                                                                                                                                                                                                                                                                                                                                                                                                                                                                                                                                                                                       | A | A  | B  |   |   |   |   |   |   |   |   |   |   |   |   |    |    |   |   |
| Subtotal (Indel-8220--SNP-11710)        |                                                                                                                                                                                                                                                                                                                                                                                                                                                                                                                                                                                                                                                                                                                                                                                                                                                                                                                                                                                                                                                                                                                                                                                                                                                         |   |    |    |   |   |   |   | 5 |   |   |   |   |   |   |   |    |    |   |   |

A = Ac7077 marker; B = B73 marker
