# Supplementary material
Source: PubMed Central journal article supplement (PMC2688972)
Supplement: 0902972106_ST3_PDF.pdf [file 0902972106_ST3_PDF.pdf]

| <b>Table S3. PCR primers</b> |                            |               |                         |
|------------------------------|----------------------------|---------------|-------------------------|
| Primer Name                  | Primer Sequence            | Primer Name   | Primer Sequence         |
| Ac132R                       | CGGAAACGGGATATACAAAACG     | HelB-3'-rlk4  | GTTGACATCGTTTATCATGCCT  |
| bz-Y6                        | ATTGCGCGCGGGTTTGATGA       | HelB-3'-rlk6  | CAATGAGCTTGCCAACCTCA    |
| bz-H1                        | GCAGGAAGAAGCTTCGACAGG      | D4255FNSF9    | TTGGGAGCATCTCCTACCTC    |
| bz-H3                        | CAGTTACCTAGCACTAGAAGAG     | D4255FNSR9    | ATCTACTCCCCTCCGTCCAC    |
| bz-3'-2F                     | AGGCGGTGAGTGCAGGAAGAAGCTTC | znf_hAT-R3Rev | TCGTCTCGTCTCCTCCCTTA    |
| stc1-H1                      | CATAGCCTAGGACGTTTCGTT      | znf-3'-R1     | TTTAGCTTGCGTGTACCAG     |
| stc1-H1F                     | ATGAGGGCGATCAGAAAAGA       | znf_F5Rev     | CACAGCACTCTCCGTCTCCA    |
| stc1-H1R                     | AACGAGGAGTGGCTGAACAT       | znfF2         | GGCAGAGCAGTCAAAACAGA    |
| stc1-H6F1                    | GTCCAATAGGGACACGATGG       | znfR2         | AGACGACGACCATGAAGAGG    |
| stc1-H6R1                    | TGAGATTTACAACATCAACCTACCTT | znfF5         | TGGAGATGGAGAGTGTCTGTG   |
| stc1-RSF6                    | TTCAGTAACGCGTGTCTTGG       | znfR5         | GATTAGGGTGGAAACCGAACA   |
| stc1-RSR6                    | CATCAGCACGAAGCTAGCAG       | znfR3         | GAACCACATGTGCATGCACT    |
| stc1-PF3                     | GGCTTTATGGACCACCATGT       | znfgR1        | TGACCAGGTTCTCCTTCCTG    |
| stc1-PR1                     | AGGGCGTGACATATTTTCCA       | znfgF3        | CTCCCCGTCACCGTCTAC      |
| stc1-PR2                     | GATCCAGCAGTAGGCACTCG       | LHznf-5'-F1   | GAACCTGGTCATCGACATCC    |
| stc1-PF4                     | ACCTGGTGCAGTGCCTGAC        | LHznf-5'-R1   | ACCAGAGAAGGCACACGAAG    |
| LHrplF1                      | TGCGAAGTCCAAAACACTGA       | LHznf-5'-F2   | GCACCTCCTCCTCCTACAGC    |
| LHrplF2                      | AGCTGCAATCCATACCAAGC       | LHznf-5'-R2   | GGGGGAAGAAGAAAGAATGAA   |
| LHrplR3                      | AACTCTGGAGGCCGTTTAT        | znf-hAT-F1    | GTCAGGACCGTGGTACTCCT    |
| LHrplR4                      | CAGTGAACCTATGTCTGTTTGG     | znf-hAT-R1    | GGCCAGCCTACGGTTTATTT    |
| rpL35A-4                     | GAAGAACGGCCTCGATCGT        | znf-hAT-F2    | GCAGCGATTGACTTGAAACC    |
| RLP35AR1                     | TTTGTGTGCGAACGGATGAA       | znf-hAT-R2    | GCCCAAGAACTTCGCACTA     |
| LH1hpF1                      | GGAAGGAGAAAGGTGAAGCA       | znf-hAT-F3    | GCCTTCTCTGGTCAAGGATG    |
| LH1hpR1                      | TCACCAGAGTGTCTATCCATCG     | znf-hAT-R3    | TAAGGGAGGAGACGAGACGA    |
| Lh1hpR4                      | TCAGCTGAAGCAGGACCTGAG      | TAC7077F1     | ACCTTCGATCTCGTTGAAA     |
| Lhtac6058F1                  | GTCGAATGATTGTGGTTGTGA      | TAC7077F2     | CCTGAGAATTCCCAAACGAA    |
| tac6058-2                    | GCGGCAAATAATACTAGGCT       | TAC7077R2     | AACAAAAGCGCAGATCACAA    |
| 1hp-8                        | TCTGTGGGTCAGTTTGGT         | B73tac7077F2  | GAGTTACGAGCCAGGTGTCAG   |
| 3hp-7                        | CCATTGAACAACCCACTGAGTGT    | B73tac7077R1  | GGAGCCGTGCTCATCATATC    |
| zm20F1                       | GCCAACTCCTCTCTATCTTTGG     | GtacF3        | CACCGACAGATAGCTTAGCA    |
| zm20R1                       | TTGTCTGGCTTGA AACAGG       | GtacR3        | GGATAGTTTGGCGAGTTGGA    |
| zm3F2                        | GGTTCCATTTTCGCGTTTA        | AC4372        | ACCGAACAAAAATACCGTTCCCG |
| zm3R2                        | GACATAACATACACCAAGTC       | indelF4       | GAAGGTCAATCAAGGCCAAA    |
| HeIA-5-R2                    | ATCTCGGGCAGAAAGGAAAG       | indelR4       | TGCAATGCTGGTGAATGAGT    |
